# Supplementary material for: Pep1, a Secreted Effector Protein of Ustilago maydis, Is Required for Successful Invasion of Plant Cells
Source: PLoS Pathog. 2009 Feb 6;5(2):e1000290. doi: 10.1371/journal.ppat.1000290 (PMC2631132; doi:10.1371/journal.ppat.1000290)
Supplement: Table S1 — Maize genes with significant changes in expression in response to infection with U. maydis strain SG200Δpep1 24 hpi compared to mock infected plants. (0.08 MB XLS) [file ppat.1000290.s006.xls]

## Sheet: pep compare result
probe set	Annotation	Accession	ZM_24h_Mock_3inf I **	ZM_24h_Mock_3inf I ** SE	pep1_24hpi_I **	pep1_24hpi_I ** SE	fold change	lower bound of FC	upper bound of FC	difference of means	filtered
Zm.14496.1.A1_at	terpene synthase/cyclase family pro/called_in_both_way/	CF014750	0.73	0.23	1306.6	236.23	1781.73	1026.98	3880.74	1305.87	*
Zm.2227.1.A1_at	BLAST:BARW_HORVU (P28814) Barwin//	BM381059	7.47	2.69	2293.57	179.49	307.17	188.72	756.59	2286.1	*
Zm.10101.1.A1_at	Polygalacturonase inhibitor precursor (Polygalacturonase-inhibiting protein)//	BM379606	1.3	0.4	377.63	67.94	290.49	168.7	617.98	376.33	*
Zm.3332.1.A1_at	Proteinase inhibitor PSI-1.2/called_in_both_way/called_in_inparanoid	BM379802	2.4	0.65	398.5	44.15	166.04	108.85	305.66	396.1	*
Zm.18513.1.S1_at	Hypothetical 14.2 kDa protein in blaB 3'region//	CO531043	0.8	0	125.9	26.72	157.37	157.37	157.37	125.1	*
Zm.791.1.S1_s_at	Zea mays; 1292 base-pairs /DEF=Zea mays CL1243_1 mRNA sequence. /REP_ORG=Z. mays	AY111675.1	4.03	2.1	633.77	91.86	157.13	79.48	1095.42	629.73	*
Zm.1450.1.S1_at	Zm#S17830298|Transcribed locus BLAST://	BM337200	8.3	3.31	1204.1	152.7	145.07	82.88	425.95	1195.8	*
Zm.281.1.S1_at	osmotin-like protein (OSM34), nearl//called_in_inparanoid	U06831.1	2.77	1.98	397.77	42.49	143.77	64.14	100000000	395	*
Zm.10175.1.A1_at	NOTHING | //	BM379420	13.63	2.85	1657.83	247.72	121.6	80.79	195.03	1644.2	*
Zm.6659.1.A1_at	osmotin-like protein (OSM34), nearl//	BM075306	33.43	2.49	3399.63	245.55	101.68	85.69	120.78	3366.2	*
Zm.1506.1.A1_at	hevein-like protein (HEL), identica/called_in_both_way/called_in_inparanoid	X82184.1	20.53	5.79	2026.23	224.42	98.68	64	187.34	2005.7	*
Zm.9845.1.S1_at	Pathogenesis-related protein PRMS precursor//	BM379918	1.1	0.65	106.6	12.56	96.91	47.25	3580.09	105.5	*
Zm.4270.2.A1_a_at	mRNA sequence /REP_ORG=Z. mays	CF628998	17.27	11.61	1660.03	177.38	96.14	44.32	100000000	1642.77	*
Zm.1595.1.S1_at	Endochitinase B precursor (EC 3.2.1.14) (Seed chitinase B) (Fragment)/called_in_both_way/called_in_inparanoid	CD967190	18.6	9.77	1763.4	376.77	94.81	44.15	704	1744.8	*
Zm.16272.1.A1_at	Glutamate--cysteine ligase (EC 6.3.2.2) (Gamma-glutamylcysteine synthetase) (Gamma-ECS) (GCS)//	CF028346	2.5	0.95	232	23.17	92.8	55.04	251.19	229.5	*
Zm.281.1.S1_s_at	Zea mays B73 antifungal zeamatin-like protein mRNA, complete cds. /FL=gb:U06831.1 /REP_ORG=Z. mays	U06831.1	31.77	14.51	2658.7	347.52	83.69	45.24	338.78	2626.93	*
ZmAffx.1198.1.A1_at	gsequence(s) not in UniGene /REP_ORG=Z. mays	BE056195	5.57	1.86	437.23	86.29	78.54	43.58	181.35	431.67	*
Zm.14226.1.A1_at	putative cytochrome P450 [Oryza sativa (japonica cultivar-group)] BLAST:C71D7_SOLCH (P93531) Cytochrome P450 71D7 (EC 1.14.-.-)//	BM337251	12.9	2.65	915.6	51.8	70.98	52.16	108.1	902.7	*
Zm.847.1.S1_at	chitinase, putative, similar to pea//called_in_inparanoid	L00973.1	10.8	5.52	740.23	70.64	68.54	36.22	433.25	729.43	*
Zm.4089.1.S1_at	Sugar transport protein 13 (Hexose transporter 13) (Multicopy suppressor of snf4 deficiency protein 1)//	AY108577.1	3.53	1.67	217.7	31.85	61.61	32.36	281.22	214.17	*
Zm.16805.8.S1_at	Endochitinase A2 precursor (EC 3.2.1.14)//	BG837630	31.33	6.28	1900.63	157.19	60.66	43.97	92.16	1869.3	*
Zm.9601.1.A1_at	Uroporphyrinogen decarboxylase (EC 4.1.1.37) (URO-D) (UPD)//	BM339800	29.1	6	1761.93	126.04	60.55	44	92.86	1732.83	*
Zm.3568.2.A1_a_at	Transcribed sequence with weak similarity to protein ref:NP_187417.1 (A.thaliana) unknown protein (Arabidopsis thaliana) /REP_ORG=Z. mays	CF629788	11.77	10.08	667.6	16.68	56.74	23.52	100000000	655.83	*
Zm.864.1.S1_at	glutathione S-transferase, putative//	AF244695.1	3.97	1.51	222.83	83.78	56.18	19.39	164.78	218.87	*
Zm.17203.1.A1_at	Nuclear envelope pore membrane protein POM 121 (Pore membrane protein of 121 kDa)//	CF631632	20.37	5.08	1135.5	71.61	55.75	38.81	95.3	1115.13	*
Zm.1085.1.A1_a_at	PRm 3=chitinase {clone CHEM 5} (Zea mays=maize, cv. INRA 258, mercuric chloride-treated, leaves, mRNA Partial, 945 nt) /REP_ORG=Z. mays	BM339391	71.4	19.24	3401.27	285.4	47.64	32	86.56	3329.87	*
Zm.15827.1.A1_at	NOTHING | //	CK370003	15.07	6.25	700.4	106.36	46.49	25.54	148.39	685.33	*
Zm.9486.1.A1_at	Hypothetical 56.3 kDa protein in ARO3-KRS1 intergenic region/called_in_both_way/called_in_inparanoid	CK347877	9.13	3.34	399.5	25.08	43.74	26.93	110.1	390.37	*
Zm.186.1.S1_at	NOTHING | //	X71396.1	20.33	7.26	865.1	107.76	42.55	25.31	104.55	844.77	*
Zm.16805.3.S1_a_at	mRNA sequence /REP_ORG=Z. mays	BM381902	102.87	22.92	4305.67	153.05	41.86	30.44	66.27	4202.8	*
Zm.9636.1.A1_at	WIR1A_WHEAT (Q01482) WIR1A protein//	BM349325	26.6	3.26	1031.63	113.17	38.78	29.59	51.25	1005.03	*
Zm.17916.1.S1_at	Zm#S26335318|Transcribed locus BLAST:/called_in_both_way/	CF633017	34.53	2.58	1308.17	158.08	37.88	29.53	47.4	1273.63	*
Zm.1458.1.S1_at	Protease prtH (EC 3.4.22.-)//	BM418233	6.07	2.96	225.03	31.96	37.09	19.34	187.93	218.97	*
Zm.8864.1.A1_s_at	mRNA sequence /REP_ORG=Z. mays	BM269430	14.37	3.82	513.57	111.11	35.75	20.25	68.18	499.2	*
Zm.2136.1.S1_at	Peroxidase 12 precursor (EC 1.11.1.7) (Atperox P12) (PRXR6) (ATP4a)/called_in_both_way/	AW282383	19.9	11.38	692.13	103.82	34.78	16.8	587.58	672.23	*
Zm.3568.1.A1_at	Putative membrane protein mmpL5/called_in_both_way/	BM080500	14.47	2.49	459.17	50.14	31.74	23.07	45.95	444.7	*
Zm.2707.1.S1_at	Peroxidase 2 precursor (EC 1.11.1.7)/called_in_both_way/	BG842199	67.3	6.84	2115.5	215.88	31.43	24.73	39.94	2048.2	*
Zm.2301.1.A1_at	putative catechol O-methyltransferase [Oryza sativa (japonica cultivar-group)] BLAST:ZRP4_MAIZE (P47917) O-methyltransferase ZRP4 (EC 2.1.1.-) (OMT)//	BM334264	9.67	4.62	287.7	79.3	29.76	12.88	143.45	278.03	*
Zm.10830.1.S1_at	BAK1_ARATH (Q94F62) BRASSINOSTEROID INSENSITIVE 1-associated receptor kinase 1 precursor (EC 2.7.11.1)//	CF028241	4	2.36	118.23	5.39	29.56	14.91	1043.05	114.23	*
Zm.3537.1.A1_at	MKL/myocardin-like protein 1 (Myocardin-related transcription factor A) (MRTF-A) (Megakaryoblastic leukemia 1 protein) (Megacaryocytic acute leukemia protein)//	CF062995	10.77	3.76	303.23	35.43	28.16	17	67.11	292.47	*
Zm.10129.1.A1_at	putative acetyltransferase [Oryza sativa (japonica cultivar-group)] BLAST:YP20_BACLI (P05332) Hypothetical P20 protein/called_in_both_way/	BM267811	3.83	0.73	104.63	4.55	27.3	20.59	39.88	100.8	*
Zm.9615.1.A1_at	putative chitinase [Oryza sativa (japonica cultivar-group)] BLAST:XIP2_ORYSA (Q53NL5) Xylanase inhibitor protein 2 precursor (Class III chitinase homolog h)//	BM338182	13.87	5.87	363.93	72.43	26.25	13.51	88.45	350.07	*
Zm.10103.1.A1_at	Hypothetical 40.6 kDa protein (ORF8')//	AI947611	21.03	0.6	549.37	90.59	26.12	18.98	33.38	528.33	*
Zm.9297.1.A1_at	RNF17_HUMAN (Q9BXT8) RING finger protein 17//	CD998185	9.1	1.86	228.27	39.13	25.08	16.16	40.41	219.17	*
Zm.7882.1.A1_at	hypothetical protein [Oryza sativa (japonica cultivar-group)] BLAST://	CF637822	8.77	3.04	211.93	16.24	24.17	15.06	56.56	203.17	*
ZmAffx.12.1.S1_at	Zea mays copalyl diphosphate synthase like-protein (An2) mRNA, complete cds. /PROD=copalyl diphosphate synthase like-protein /FL=gb:AY562491.1 /REP_ORG=Z. mays	AY562491.1	17.7	5.13	427.63	41.2	24.16	15.73	46.82	409.93	*
Zm.8822.2.A1_at	Glycerol-3-phosphate acyltransferase 6 (EC 2.3.1.15) (AtGPAT6)//called_in_inparanoid	BM331999	25.23	10.67	604.63	12.16	23.96	14.11	78.7	579.4	*
Zm.11803.1.A1_at	Zm#S26665243|Transcribed locus, weakly similar to XP_474444.1 OSJNBa0039K24.4 [Oryza sativa (japonica cultivar-group)] BLAST:PER2_HORVU (Q01548) Peroxidase 2 (EC 1.11.1.7) (Fragment)//	BM380872	10.67	1.31	249.4	108.01	23.38	6.67	42.09	238.73	*
Zm.187.1.S1_at	NOTHING | peroxidase 12 (PER12) (P12) (PRXR6)//called_in_inparanoid	CK370048	18.63	2.96	429.1	82.82	23.03	14.76	34.66	410.47	*
Zm.4202.1.A1_at	Zm#S11327074|Transcribed locus, moderately similar to NP_922234.1 hypothetical protein [Oryza sativa (japonica cultivar-group)] BLAST:R1B12_SOLDE (Q6L3Z4) Putative late blight resistance protein homolog R1B-12//	CB350777	5.6	2.48	125.3	12.89	22.38	12.51	82.7	119.7	*
Zm.16226.1.A1_at	Zm#S11418360|Hypothetical LOC542299 BLAST:ZEAM_MAIZE (P33679) Zeamatin precursor//called_in_inparanoid	BM348522	9.53	2.75	188.87	30.64	19.81	12.03	39.16	179.33	*
Zm.1967.1.A1_at	Zm#S11528813|PCO091453 mRNA sequence BLAST:PR1_ASPOF (Q05736) Pathogenesis-related protein 1 (AOPR1)//	BG836522	61.57	12.42	1162.73	227.9	18.89	11.67	30.78	1101.17	*
Zm.12518.1.A1_at	Zm#S11487024|Transcribed locus, weakly similar to XP_482788.1 germin-like protein [Oryza sativa (japonica cultivar-group)] BLAST:GL31_ARATH (P94040) Germin-like protein subfamily 3 member 1 precursor (AtGER1) (At-GERM1) (AtGLP1)//	CA452751	9.57	3.78	174.13	48.49	18.2	8.28	54.72	164.57	*
Zm.10377.1.A1_at	Zm#S27174018|Transcribed locus, moderately similar to NP_908704.1 putative peroxidase [Oryza sativa (japonica cultivar-group)] BLAST:PER52_ARATH (Q9FLC0) Peroxidase 52 precursor (EC 1.11.1.7) (Atperox P52) (ATP49)//	BU050860	66.5	4.98	1177.3	236.85	17.7	11.67	24.28	1110.8	*
Zm.301.1.A1_a_at	gb:BM334689 /DB_XREF=gi:18164850 /DB_XREF=MEST140-F11.T3 /CLONE=MEST140-F11 /TID=Zm.301.1 /CNT=41 /FEA=mRNA /TIER=Stack /STK=29 /UG=Zm.301 /UG_TITLE=Z.mays mRNA for subtilisin-chymotrypsin inhibitor /REP_ORG=Z. mays	BM334689	97.6	28.3	1706.93	184.79	17.49	11.27	34.01	1609.33	*
Zm.18148.1.A1_at	Zm#S11361768|Transcribed locus, moderately similar to XP_475074.1 putative 33 kDa secretory protein [Oryza sativa (japonica cultivar-group)] BLAST:UDU1_ARATH (Q9FHD5) DUF26 domain-containing protein 1 precursor//	CN844779	10.8	0.85	172.03	11.92	15.93	13.42	18.99	161.23	*
Zm.2233.1.A1_at	Zm#S27411294|PCO099353 mRNA sequence BLAST:HAK1_ORYSA (Q6VVA6) Potassium transporter 1 (OsHAK1)//	CO527146	9.77	2.07	154.03	25.42	15.77	10.21	25.69	144.27	*
Zm.13583.1.S1_at	NOTHING | secretory protein, putative, simila/called_in_both_way/called_in_inparanoid	AY108161.1	29.73	4.1	459.73	60.54	15.46	11.25	21.34	430	*
Zm.7654.1.A1_at	Zm#S25119341|Transcribed locus, weakly similar to NP_563858.1 unknown protein [Arabidopsis thaliana] BLAST:ERG28_ARATH (O80594) Probable ergosterol biosynthetic protein 28//	BG874072	16.93	3.24	261.8	23.05	15.46	11.27	23.06	244.87	*
Zm.11779.1.A1_at	Zm#S25114840|PCO116943 mRNA sequence BLAST:GALM_RAT (Q66HG4) Aldose 1-epimerase (EC 5.1.3.3) (Galactose mutarotase)/called_in_both_way/	CO527258	28.8	2.73	443.67	36.65	15.41	12.54	19.04	414.87	*
Zm.2376.1.A1_a_at	gb:AF001634.1 /DB_XREF=gi:2226328 /GEN=IIG1 /TID=Zm.2376.1 /CNT=73 /FEA=FLmRNA /TIER=FL+Stack /STK=56 /UG=Zm.2376 /DEF=Zea mays physical impedance induced protein (IIG1) mRNA, complete cds. /PROD=physical impedance induced protein /FL=gb:AF001634.1 /REP_ORG=Z. mays	AF001634.1	9.77	4.93	148.6	74.06	15.22	2.56	95.37	138.83	*
Zm.8726.1.A1_at	Zm#S11323706|CL1774_-2 mRNA sequence BLAST:TLP_ORYSA (P31110) Thaumatin-like protein precursor//	BM266883	11.5	4.06	168.6	57.92	14.66	5.73	38.54	157.1	*
Zm.12900.1.S1_at	Zm#S22335076|Clone EL01N0417H01.c mRNA sequence BLAST:SRK6_BRAOE (Q09092) Putative serine/threonine-protein kinase receptor precursor (EC 2.7.11.1) (S-receptor kinase) (SRK)/called_in_both_way/	CA401269	17.8	3.08	258.37	38.27	14.51	9.98	21.62	240.57	*
Zm.12208.1.A1_at	Zm#S27924357|Transcribed locus, moderately similar to NP_917794.1 putative cytochrome P450 [Oryza sativa (japonica cultivar-group)] BLAST:C72A1_CATRO (Q05047) Cytochrome P450 72A1 (EC 1.3.3.9) (CYPLXXII) (Secologanin synthase) (SLS)//	BM736144	15.83	1.73	227.17	32.29	14.35	10.5	19.15	211.33	*
Zm.12391.1.S1_at	Zm#S11527024|PCO133046 mRNA sequence BLAST:CHIA_MAIZE (P29022) Endochitinase A precursor (EC 3.2.1.14) (Seed chitinase A)//	CF349132	12.73	5.02	180.83	22.27	14.2	8.17	40.84	168.1	*
Zm.10410.1.S1_a_at	gb:CK144329 /DB_XREF=gi:38687298 /DB_XREF=3530_1_10_1_B12.x_11 /TID=Zm.10410.1 /CNT=2 /FEA=EST /TIER=ConsEnd /STK=0 /UG=Zm.10410 /UG_TITLE=Transcribed sequence with weak similarity to protein ref:NP_172022.1 (A.thaliana) putative zinc transporter (Arabidopsis thaliana) /REP_ORG=Z. mays	CK144329	8.6	4.85	115.23	21.94	13.4	6.24	187.91	106.63	*
Zm.11141.1.S1_at	Zm#S11525814|PCO130441 mRNA sequence BLAST:AMT12_LYCES (O04161) Ammonium transporter 1, member 2 (LeAMT1;2)//	AY106810.1	16.43	4.43	206.93	20.48	12.59	8.36	23.01	190.5	*
Zm.11804.1.A1_s_at	gb:BM380880 /DB_XREF=gi:18179676 /DB_XREF=MEST526-F05.univ /CLONE=MEST526-F05 /TID=Zm.11804.1 /CNT=3 /FEA=EST /TIER=ConsEnd /STK=0 /UG=Zm.11804 /UG_TITLE=Transcribed sequence with weak similarity to protein ref:NP_188627.1 (A.thaliana) monosaccharide transport protein, STP4 (Arabidopsis thaliana) /REP_ORG=Z. mays	BM380880	59.83	4.53	747.67	63.68	12.5	10.32	15.06	687.83	*
Zm.8557.1.A1_at	Zm#S11439975|Transcribed locus BLAST://	BM336541	10.67	2.12	128.57	4.83	12.05	9.02	17.96	117.9	*
Zm.2005.1.A1_at	Zm#S11325815|Transcribed locus, moderately similar to NP_915435.1 putative FIERG1 protein [Oryza sativa (japonica cultivar-group)] BLAST:ERG1_ORYSA (Q7GC09) Elicitor-responsive protein 1 (Fungal elicitor immediate early-responsive gene 1 protein) (FIERG1)/called_in_both_way/called_in_inparanoid	BM379246	15	0.82	179.9	27.48	11.99	8.88	15.3	164.9	*
Zm.9554.1.A1_at	Zm#S11322370|Transcribed locus, moderately similar to XP_473284.1 OSJNBa0081C01.20 [Oryza sativa (japonica cultivar-group)] BLAST:DHCA_PONPY (Q5RCU5) Carbonyl reductase [NADPH] 1 (EC 1.1.1.184) (NADPH-dependent carbonyl reductase 1)//	BM267111	14.93	5.25	168.37	37.05	11.27	5.94	27.95	153.43	*
Zm.561.1.A1_at	NOTHING | glutathione S-transferase, putative/called_in_both_way/	AF244701.1	13	4.16	144.57	11.01	11.12	7.12	23.63	131.57	*
Zm.14663.1.S1_s_at	gb:CN844584 /DB_XREF=gi:47961875 /DB_XREF=EST2534 /CLONE=ES6088 /TID=Zm.14663.1 /CNT=4 /FEA=EST /TIER=ConsEnd /STK=0 /UG=Zm.14663 /UG_TITLE=Transcribed sequence with weak similarity to protein ref:NP_563841.1 (A.thaliana) expressed protein (Arabidopsis thaliana) /REP_ORG=Z. mays	CN844584	20.47	2.5	226.8	9.88	11.08	9.09	14	206.33	*
Zm.8927.1.S1_at	NOTHING | arabinogalactan-protein, putative (//	BQ578253	107.67	16.56	1185.07	129.07	11.01	8.15	15.37	1077.4	*
Zm.14951.1.S1_a_at	gb:M36914.1 /DB_XREF=gi:168458 /TID=Zm.14951.1 /CNT=2 /FEA=mRNA /TIER=ConsEnd /STK=0 /UG=Zm.14951 /UG_TITLE=Z.mays cell wall protein mRNA, 3 end /DEF=Z.mays cell wall protein mRNA, 3 end. /REP_ORG=Z. mays	M36914.1	58.97	15.73	640.07	97.03	10.85	6.82	20.07	581.1	*
Zm.1871.1.A1_at	Zm#S26198957|Transcribed locus, weakly similar to NP_917453.1 P0415C01.8 [Oryza sativa (japonica cultivar-group)] BLAST:YH09_YEAST (P38892) Hypothetical 33.8 kDa protein in TWT1-FLO5 intergenic region/called_in_both_way/	BM338644	25.4	13.72	272.57	37.83	10.73	5.37	96.52	247.17	*
Zm.14951.2.S1_x_at	gb:BG837389 /DB_XREF=gi:14203712 /DB_XREF=Zm10_06c10_A /CLONE=Zm10_06c10 /TID=Zm.14951.2 /CNT=52 /FEA=EST /TIER=Stack /STK=8 /UG=Zm.14951 /UG_TITLE=Z.mays cell wall protein mRNA, 3 end /REP_ORG=Z. mays	BG837389	64.7	12.66	678.93	98.04	10.49	7.11	16.3	614.23	*
Zm.4596.1.A1_at	Zm#S17032819|CL452_-8 mRNA sequence BLAST:LOX4_ORYSA (Q53RB0) Probable lipoxygenase 4 (EC 1.13.11.12)//	CF636987	41.5	6.84	432.23	30.26	10.42	7.95	14.53	390.73	*
Zm.555.1.S1_at	NOTHING | glutathione S-transferase, putative//	AF244694.1	11.17	4.33	115.33	24.57	10.33	5.35	29.52	104.17	*
Zm.8714.1.A1_at	NOTHING | 1-aminocyclopropane-1-carboxylate o/called_in_both_way/called_in_inparanoid	AY359573.1	42.9	21.56	442.07	41.58	10.3	5.49	59.55	399.17	*
Zm.12550.1.A1_at	Zm#S11451832|Transcribed locus BLAST:WNK2_HUMAN (Q9Y3S1) Serine/threonine-protein kinase WNK2 (EC 2.7.11.1) (Protein kinase with no lysine 2) (Protein kinase, lysine-deficient 2)//	BM380224	15.9	2.59	163.37	6.66	10.27	8.02	14.12	147.47	*
Zm.10003.1.A1_at	Zm#S25102520|Transcribed locus BLAST:PHLA1_HUMAN (Q8WV24) Pleckstrin homology-like domain family A member 1 (T-cell death-associated gene 51 protein) (Apoptosis-associated nuclear protein) (Proline- and histidine-rich protein) (Proline- and glutamine-rich//	BM379977	31.87	1.68	320.43	41.06	10.06	7.83	12.43	288.57	*
Zm.2376.1.A1_x_at	gb:AF001634.1 /DB_XREF=gi:2226328 /GEN=IIG1 /TID=Zm.2376.1 /CNT=73 /FEA=FLmRNA /TIER=FL+Stack /STK=56 /UG=Zm.2376 /DEF=Zea mays physical impedance induced protein (IIG1) mRNA, complete cds. /PROD=physical impedance induced protein /FL=gb:AF001634.1 /REP_ORG=Z. mays	AF001634.1	20.63	9.3	201.13	77.39	9.75	3.15	40.19	180.5	*
Zm.1489.1.A1_at	Zm#S27933773|PCO149839 mRNA sequence BLAST:ACCO1_ORYSA (Q40634) 1-aminocyclopropane-1-carboxylate oxidase 1 (EC 1.14.17.4) (ACC oxidase 1) (Ethylene-forming enzyme) (EFE)/called_in_both_way/	CO519381	25.6	3.51	249.4	81.03	9.74	4.44	16.09	223.8	*
Zm.9675.1.A1_at	Zm#S11443323|Transcribed locus, moderately similar to NP_921476.1 putative class III chitinase RCB4 [Oryza sativa (japonica cultivar-group)] BLAST:CHIT1_TULBA (Q9SLP4) Chitinase 1 precursor (EC 3.2.1.14) (Tulip bulb chitinase-1) (TBC-1)//	BM335265	142.2	18.35	1363.4	92.77	9.59	7.64	12.44	1221.2	*
Zm.14951.1.S1_x_at	gb:M36914.1 /DB_XREF=gi:168458 /TID=Zm.14951.1 /CNT=2 /FEA=mRNA /TIER=ConsEnd /STK=0 /UG=Zm.14951 /UG_TITLE=Z.mays cell wall protein mRNA, 3 end /DEF=Z.mays cell wall protein mRNA, 3 end. /REP_ORG=Z. mays	M36914.1	17.93	8.7	171.5	23.47	9.56	5.02	47.65	153.57	*
Zm.1776.1.S1_at	Zm#S11326867|Transcribed locus, moderately similar to NP_564277.1 unknown protein [Arabidopsis thaliana] BLAST:VP5_RDVF (Q85437) Minor core protein P5//	BM382204	11.87	3.94	113.33	7.14	9.55	6.08	21.16	101.47	*
Zm.11650.1.A1_at	NOTHING | peroxidase, putative, similar to pe//	BM379683	65.23	8.48	610.37	34.17	9.36	7.53	12.08	545.13	*
Zm.10674.1.A1_at	Zm#S27915787|Transcribed locus, weakly similar to XP_468149.1 unknown protein [Oryza sativa (japonica cultivar-group)] BLAST:PVG3_SCHPO (Q9USX0) Beta-1,3-galactosyltransferase pvg3 (EC 2.4.1.134) (Pyruvylated Gal-beta-1,3-epitope synthesis protein 3) (PvG//	BM380580	37.07	1.72	339.73	15.75	9.17	8.23	10.21	302.67	*
Zm.1670.1.A1_at	Zm#S25100402|PCO078606 mRNA sequence BLAST:IF2_NEIG1 (Q5F797) Translation initiation factor IF-2//	AY109012.1	68.17	13.63	617.37	83.74	9.06	6.19	14.12	549.2	*
Zm.17165.1.S1_at	Zm#S18216100|Transcribed locus, weakly similar to NP_914266.1 putative peroxidase [Oryza sativa (japonica cultivar-group)] BLAST:PER12_ARATH (Q96520) Peroxidase 12 precursor (EC 1.11.1.7) (Atperox P12) (PRXR6) (ATP4a)//	BQ539474	43.67	9.43	386.83	79.73	8.86	5.31	14.97	343.17	*
Zm.3129.1.A1_at	Zm#S11528941|ZEM3 BLAST:PPO2_IPOBA (Q9MB14) Polyphenol oxidase II, chloroplast precursor (EC 1.10.3.1) (PPO-II) (Catechol oxidase II)//	BM378126	47.67	10.36	411.17	104.41	8.63	4.66	15.12	363.5	*
Zm.16805.3.S1_x_at	gb:BM381902 /DB_XREF=gi:18180692 /DB_XREF=MEST541-G05.univ /CLONE=MEST541-G05 /TID=Zm.16805.3 /CNT=9 /FEA=mRNA /TIER=ConsEnd /STK=1 /UG=Zm.16805 /UG_TITLE=PCO137155 mRNA sequence /REP_ORG=Z. mays	BM381902	114.97	22.83	989.37	59.52	8.61	6.36	12.91	874.4	*
Zm.2139.1.S1_at	Zm#S25128155|Transcribed locus, weakly similar to NP_917983.1 putative chitinase [Oryza sativa (japonica cultivar-group)] BLAST:XIP1_WHEAT (Q8L5C6) Xylanase inhibitor protein 1 precursor (Class III chitinase homolog) (XIP-I protein)//	CF627469	74.73	28.18	643.8	69.36	8.61	5.1	22.89	569.07	*
Zm.7998.1.A1_at	Zm#S11526142|PCO097882 mRNA sequence BLAST:MTDH_MESCR (P93257) Probable mannitol dehydrogenase (EC 1.1.1.255) (NAD-dependent mannitol dehydrogenase)//called_in_inparanoid	AY106482.1	45.97	7.32	388.17	29.88	8.44	6.45	11.69	342.2	*
Zm.17110.1.S1_at	Zm#S18249711|Transcribed locus, moderately similar to XP_467062.1 putative cytochrome b5 [Oryza sativa (japonica cultivar-group)] BLAST:CYB51_ARATH (Q42342) Cytochrome b5 isoform 1//	CF972406	14.57	1.97	122.27	7.4	8.39	6.69	10.97	107.7	*
Zm.10177.1.A1_at	Zm#S11450934|CL5928_-3 mRNA sequence BLAST:AL3A2_RAT (P30839) Fatty aldehyde dehydrogenase (EC 1.2.1.3) (Aldehyde dehydrogenase, microsomal) (Aldehyde dehydrogenase family 3 member A2) (Aldehyde dehydrogenase 10)//	BM382782	32.27	0.99	269.77	5.24	8.36	7.88	8.88	237.5	*
Zm.17954.1.A1_at	Zm#S27919345|Transcribed locus, weakly similar to NP_199851.2 hydrolase/ protein serine/threonine phosphatase [Arabidopsis thaliana] BLAST:NPP_HORVU (Q687E1) Nucleotide pyrophosphatase/phosphodiesterase (EC 3.-.-.-) (Fragments)//called_in_inparanoid	CF628835	54.33	1.23	450.1	24.64	8.28	7.49	9.1	395.77	*
Zm.7489.1.A1_at	Zm#S26235778|Transcribed locus, weakly similar to XP_482068.1 serine threonine kinase-like [Oryza sativa (japonica cultivar-group)] BLAST:PBS1_ARATH (Q9FE20) Serine/threonine-protein kinase PBS1 (EC 2.7.11.1) (AvrPphB susceptible protein 1)//	BM078668	39.13	8.79	320.77	19.17	8.2	5.88	13.11	281.63	*
Zm.17839.1.S1_at	NOTHING | glutathione S-transferase, putative//	U12679.1	230.6	38.83	1862.13	277.53	8.08	5.57	11.93	1631.53	*
Zm.1495.1.A1_at	Zm#S11522926|CL4149_1 mRNA sequence BLAST:DSD1_SCHPO (O59715) Dihydroceramide delta(4)-desaturase (EC 1.14.-.-)/called_in_both_way/called_in_inparanoid	AY109698.1	211.23	17.02	1541.03	148.69	7.3	5.9	8.95	1329.8	*
Zm.783.1.S1_at	Zm#S27574193|PCO126203 mRNA sequence BLAST:SIRB_BACME (P61817) Sirohydrochlorin ferrochelatase (EC 4.99.1.4)//	AY105282.1	21.6	7.11	156.97	32.7	7.27	3.98	16.59	135.37	*
Zm.11758.1.A1_at	Zm#S27914636|Transcribed locus, moderately similar to NP_922524.1 unknown protein [Oryza sativa (japonica cultivar-group)] BLAST:FLS_PETHY (Q07512) Flavonol synthase/flavanone 3-hydroxylase (EC 1.14.11.23) (EC 1.14.11.9) (FLS)//called_in_inparanoid	CF028197	184.9	6.14	1321.23	98.43	7.15	6.21	8.13	1136.33	*
Zm.3371.1.A1_at	Zm#S11527533|PCO138435 mRNA sequence BLAST:ZRP4_MAIZE (P47917) O-methyltransferase ZRP4 (EC 2.1.1.-) (OMT)//	BM080684	123.73	8.85	883.03	127.91	7.14	5.32	9.15	759.3	*
Zm.2147.1.A1_s_at	gb:BM380613 /DB_XREF=gi:18179403 /DB_XREF=MEST522-D11.univ /CLONE=MEST522-D11 /TID=Zm.2147.1 /CNT=18 /FEA=mRNA /TIER=Stack /STK=10 /UG=Zm.2147 /UG_TITLE=PCO072958 mRNA sequence /REP_ORG=Z. mays	BM380613	93	34.53	659.57	172.57	7.09	3.4	19.22	566.57	*
Zm.14951.3.S1_x_at	gb:BQ048061 /DB_XREF=gi:19822037 /DB_XREF=1091002B06.y1 /TID=Zm.14951.3 /CNT=35 /FEA=EST /TIER=Stack /STK=8 /UG=Zm.14951 /UG_TITLE=Z.mays cell wall protein mRNA, 3 end /REP_ORG=Z. mays	BQ048061	56.4	5.67	395.6	144.43	7.01	2.78	11.65	339.2	*
Zm.2376.6.S1_x_at	gb:CF020992 /DB_XREF=gi:32916180 /DB_XREF=QBO2c09.xg /CLONE=QBO2c09 /TID=Zm.2376.6 /CNT=85 /FEA=EST /TIER=Stack /STK=13 /UG=Zm.2376 /UG_TITLE=Z.mays mRNA that delineates a novel subset of cortical cells /REP_ORG=Z. mays	CF020992	29.07	6.64	200.9	79.61	6.91	2.32	13.77	171.83	*
Zm.7659.1.S1_at	NOTHING | phosphate transporter (PT2), identi/called_in_both_way/	AY639019.1	80.9	13.9	544.73	21.58	6.73	5.2	9.43	463.83	*
Zm.6685.1.A1_at	Zm#S11446067|PCO136332 mRNA sequence BLAST:EST1A_HUMAN (Q86US8) Telomerase-binding protein EST1A (Ever shorter telomeres 1A) (Telomerase subunit EST1A) (EST1-like protein A) (hSmg5/7a)//	BM348182	98.33	14.88	659.47	119.6	6.71	4.42	9.88	561.13	*
Zm.3278.1.S1_at	Zm#S27936228|PCO089228 mRNA sequence BLAST:HYES_HUMAN (P34913) Epoxide hydrolase 2 (EC 3.3.2.3) (Soluble epoxide hydrolase) (SEH) (Epoxide hydratase) (Cytosolic epoxide hydrolase) (CEH)//	CO521555	154.83	19.98	1024.53	68.22	6.62	5.28	8.58	869.7	*
Zm.17186.1.A1_at	Zm#S11528904|PCO070526 mRNA sequence BLAST:RDH1_HUMAN (Q92781) 11-cis retinol dehydrogenase (EC 1.1.1.105) (11-cis RDH)//	BM416697	20.17	9.95	131.23	26.51	6.51	3.16	35.04	111.07	*
ZmAffx.442.1.A1_at	gb:AI677001 /DB_XREF=gi:4885881 /DB_XREF=605048A07.x1 /TID=ZmAffx.442.1 /CNT=1 /FEA=EST /TIER=ConsEnd /STK=0 /NOTE=sequence(s) not in UniGene /REP_ORG=Z. mays	AI677001	23.6	2.04	151.77	43.94	6.43	3.33	9.8	128.17	*
Zm.19022.1.S1_at	Zm#S21151699|PCO064681 mRNA sequence BLAST:GID1_ORYSA (Q6L545) Gibberellin receptor GID1 (EC 3.-.-.-) (Gibberellin-insensitive dwarf protein 1) (Protein GIBBERELLIN INSENSITIVE DWARF1)/called_in_both_way/	CO526898	57.5	13.55	365.4	58.93	6.35	4.05	10.91	307.9	*
Zm.18147.1.S1_at	Zm#S27411340|Transcribed locus, weakly similar to XP_470656.1 Hypothetical protein [Oryza sativa (japonica cultivar-group)] BLAST:PMPC_CHLMU (Q9PJY1) Probable outer membrane protein pmpC precursor (Polymorphic membrane protein C)//	CN845526	31.63	6.21	197.77	39.91	6.25	3.84	10.12	166.13	*
Zm.7159.1.A1_at	Zm#S26665282|Transcribed locus, weakly similar to NP_564720.1 unknown protein [Arabidopsis thaliana] BLAST:Y5161_ARATH (Q9M015) Protein At5g01610//called_in_inparanoid	CF972430	151.07	16.38	941.43	222.93	6.23	3.72	9.16	790.37	*
Zm.10708.1.A1_at	Zm#S11486633|PCO076731 mRNA sequence BLAST:IPYR_MAIZE (O48556) Soluble inorganic pyrophosphatase (EC 3.6.1.1) (Pyrophosphate phospho-hydrolase) (PPase)//called_in_inparanoid	BQ619472	44	2.95	272.97	38.04	6.2	4.69	7.87	228.97	*
ZmAffx.7.1.S1_at	gb:AY683004.1 /DB_XREF=gi:50953793 /GEN=MST1 /TID=ZmAffx.7.1 /CNT=1 /FEA=FLmRNA /TIER=FL /STK=1 /NOTE=sequence(s) not in UniGene /DEF=Zea mays monosaccharide transport protein 1 (MST1) mRNA, complete cds. /PROD=monosaccharide transport protein 1 /FL=gb:AY683004.1 /REP_ORG=Z. mays	AY683004.1	28.8	3.25	177.53	18.91	6.16	4.77	8	148.73	*
Zm.2859.1.A1_a_at	gb:BM351067 /DB_XREF=gi:18175929 /DB_XREF=MEST272-H01.T3 /CLONE=MEST272-H01 /TID=Zm.2859.1 /CNT=40 /FEA=mRNA /TIER=ConsEnd /STK=1 /UG=Zm.2859 /UG_TITLE=Maize Adh2-N mRNA for alcohol dehydrogenase 2 /REP_ORG=Z. mays	BM351067	38.63	8.2	236.33	51.53	6.12	3.59	10.34	197.7	*
Zm.1708.1.S1_at	Zm#S11525027|PCO071961 mRNA sequence BLAST:MDAR_LYCES (Q43497) Monodehydroascorbate reductase (EC 1.6.5.4) (MDAR) (Ascorbate free radical reductase) (AFR reductase)//called_in_inparanoid	CF626580	195.67	15.62	1186.8	103.83	6.07	4.98	7.37	991.13	*
Zm.16518.1.S1_at	Zm#S11526735|PCO082803 mRNA sequence BLAST:PRF1_LYCES (Q00451) 36.4 kDa proline-rich protein/called_in_both_way/called_in_inparanoid	AY105889.1	541.43	68.48	3275.23	480.83	6.05	4.33	8.31	2733.8	*
Zm.3396.1.S1_at	Zm#S11525036|PCO070301 mRNA sequence BLAST:CAPP4_ARATH (Q8GVE8) Phosphoenolpyruvate carboxylase 4 (EC 4.1.1.31) (PEPCase 4) (PEPC 4) (AtPPC4)/called_in_both_way/	AY107588.1	58.17	15.74	335.23	71.75	5.76	3.27	11.11	277.07	*
Zm.9932.1.A1_at	Zm#S16334443|Transcribed locus, weakly similar to NP_917414.1 OSJNBb0024F06.19 [Oryza sativa (japonica cultivar-group)] BLAST://	CF005271	26.17	9.69	149.7	38.8	5.72	2.76	15.43	123.53	*
Zm.16733.1.A1_at	Zm#S31656961|Transcribed locus, moderately similar to NP_188931.1 calcium-transporting ATPase/ calmodulin binding [Arabidopsis thaliana] BLAST:ACA7_ARATH (O64806) Putative calcium-transporting ATPase 7, plasma membrane-type (EC 3.6.3.8) (Ca(2+)-ATPase iso//	CF623723	81.67	9.51	448.67	46.25	5.49	4.26	7.15	367	*
Zm.19319.1.A1_at	Zm#S26218332|Transcribed locus, moderately similar to XP_466471.1 putative acyltransferase (46.9 kD) (1H765) [Oryza sativa (japonica cultivar-group)] BLAST:LYPA3_HUMAN (Q8NCC3) 1-O-acylceramide synthase precursor (EC 2.3.1.-) (ACS) (Lysosomal phospholipas/called_in_both_way/	BI992453	122.33	33.57	652.13	186.55	5.33	2.57	10.82	529.8	*
Zm.3303.1.A1_at	NOTHING | lipoxygenase (LOX1), identical to S//	AF271894.1	199.8	41.86	1046.97	381.05	5.24	2.03	9.87	847.17	*
Zm.13065.1.A1_at	Zm#S22336051|PCO143515 mRNA sequence BLAST:SOX_ARATH (Q9SJA7) Probable sarcosine oxidase (EC 1.5.3.1)/called_in_both_way/called_in_inparanoid	CD437453	77.17	4.48	395.17	18.1	5.12	4.54	5.8	318	*
Zm.11852.1.A1_x_at	gb:CF013366 /DB_XREF=gi:32908553 /DB_XREF=QBK5b03.xg /CLONE=QBK5b03 /TID=Zm.11852.1 /CNT=13 /FEA=EST /TIER=ConsEnd /STK=0 /UG=Zm.11852 /UG_TITLE=Transcribed sequences /REP_ORG=Z. mays	CF013366	127.33	13.33	649.83	104.42	5.1	3.62	6.9	522.5	*
Zm.7453.1.A1_at	Zm#S22333989|Clone EL01N0448D09.d mRNA sequence BLAST:MYRO_BRANA (Q00326) Myrosinase precursor (EC 3.2.1.147) (Sinigrinase) (Thioglucosidase)//called_in_inparanoid	BM078460	65.83	14.18	329.9	55.16	5.01	3.22	8.24	264.07	*
Zm.10845.1.A1_at	NOTHING | nucellin protein, putative, similar/called_in_both_way/called_in_inparanoid	BI992910	38.9	7.58	194.3	10.3	4.99	3.72	7.41	155.4	*
Zm.14674.1.S1_at	Zm#S21153214|Transcribed locus BLAST:KIF1C_RAT (O35787) Kinesin-like protein KIF1C (Kinesin-like protein KIF1D)/called_in_both_way/called_in_inparanoid	BM382447	87.23	8.85	426.93	61.05	4.89	3.6	6.47	339.7	*
Zm.2926.1.A1_at	Zm#S21149235|Transcribed locus, weakly similar to XP_476200.1 unknown protein [Oryza sativa (japonica cultivar-group)] BLAST:CALL1_ARATH (P30188) Calmodulin-like protein 1/called_in_both_way/	CF630141	88.4	13.97	420.37	51.37	4.76	3.45	6.75	331.97	*
Zm.12118.1.A1_at	Zm#S28124487|PCO065144 mRNA sequence BLAST:PRGR_HUMAN (P06401) Progesterone receptor (PR)//	BQ034341	60.33	23.54	284.5	20.13	4.72	2.82	13.21	224.17	*
Zm.17192.1.A1_at	Zm#S18215767|Transcribed locus, moderately similar to NP_918357.1 OJ1014_G12.25 [Oryza sativa (japonica cultivar-group)] BLAST:PIR7B_ORYSA (Q43360) Putative esterase PIR7B (EC 3.1.-.-)//	BM339467	46.7	7.14	220.63	20.07	4.72	3.58	6.51	173.93	*
Zm.3710.1.S1_at	Zm#S26330462|PCO125769 mRNA sequence BLAST:Y933_METJA (Q58343) Hypothetical protein MJ0933/called_in_both_way/called_in_inparanoid	AI967181	47.83	7.33	224.2	12.02	4.69	3.67	6.34	176.37	*
Zm.11185.1.S1_at	Zm#S27578016|PCO134569 mRNA sequence BLAST://	CF349219	37.93	3.99	177.53	5.15	4.68	3.96	5.69	139.6	*
Zm.6671.3.S1_at	Zm#S26666013|Germin-like protein 1 BLAST:NEC1_NICLS (Q94EG3) Nectarin-1 precursor (EC 1.15.1.1) (Superoxide dismutase [Mn])/called_in_both_way/	CO519752	330.43	62	1543	271.36	4.67	3.03	7.3	1212.57	*
Zm.3633.4.A1_at	Zm#S22336129|Clone Contig291 mRNA sequence BLAST:APX1_ORYSA (P93404) L-ascorbate peroxidase 1, cytosolic (EC 1.11.1.11) (APXa)//	CF628836	41.83	4.84	189.97	53.34	4.54	2.39	7.03	148.13	*
Zm.7517.1.A1_at	Zm#S27919878|Transcribed locus, moderately similar to NP_916357.1 putative purple acid phosphatase [Oryza sativa (japonica cultivar-group)] BLAST:PPAF_SOYBN (Q09131) Purple acid phosphatase precursor (EC 3.1.3.2) (Manganese(II) purple acid phosphatase)/called_in_both_way/	BM078773	77.4	6.3	347.3	27.28	4.49	3.72	5.42	269.9	*
Zm.1956.1.S1_at	Zm#S19020014|Transcribed locus, moderately similar to NP_922520.1 hypothetical protein [Oryza sativa (japonica cultivar-group)] BLAST:SBCC_RHOCA (O68032) Nuclease sbcCD subunit C/called_in_both_way/	BM073956	40.2	1.57	178.3	20.67	4.44	3.56	5.35	138.1	*
Zm.17271.6.S1_x_at	gb:BM347749 /DB_XREF=gi:18172361 /DB_XREF=MEST281-F10.T3 /CLONE=MEST281-F10 /TID=Zm.17271.6 /CNT=45 /FEA=EST /TIER=Stack /STK=11 /UG=Zm.17271 /UG_TITLE=PCO096351 mRNA sequence /REP_ORG=Z. mays	BM347749	1306.83	229.12	5761.73	235.72	4.41	3.39	6.23	4454.9	*
Zm.17589.1.A1_at	Zm#S11526384|PCO091486 mRNA sequence BLAST:Y103_SYNY3 (Q55874) Hypothetical protein sll0103//	CK144401	113.33	10.17	499.7	26.39	4.41	3.74	5.28	386.37	*
Zm.4294.1.A1_at	Zm#S18247771|PCO102879 mRNA sequence BLAST:SCNAA_RABIT (O97741) Amiloride-sensitive sodium channel alpha-subunit (Epithelial Na+ channel alpha subunit) (Alpha ENaC) (Nonvoltage-gated sodium channel 1 alpha subunit) (SCNEA) (Alpha NaCH)/called_in_both_way/	CF003186	52.87	7.4	230.63	25.21	4.36	3.27	5.94	177.77	*
Zm.1616.1.A1_at	Zm#S11523966|PCO073925 mRNA sequence BLAST:PER2_ORYSA (P37835) Peroxidase 2 precursor (EC 1.11.1.7)//	BM380022	114.03	29.68	493.63	47.1	4.33	2.91	7.69	379.6	*
Zm.17990.1.S1_at	Zm#S11529043|PCO138516 mRNA sequence BLAST:MMS2_SCHPO (O74983) Ubiquitin-conjugating enzyme spm2 (Ubiquitin-conjugating enzyme variant MMS2 homolog) (UEV MMS2)//	BG837629	60.87	6.32	263.3	55.16	4.33	2.76	6.15	202.43	*
Zm.11214.1.S1_at	Zm#S11325317|PCO080642 mRNA sequence BLAST:PER12_ARATH (Q96520) Peroxidase 12 precursor (EC 1.11.1.7) (Atperox P12) (PRXR6) (ATP4a)//	AY107230.1	133.03	11.52	569.37	31.25	4.28	3.63	5.1	436.33	*
Zm.16805.3.S1_at	Zm#S11528885|PCO142303 mRNA sequence BLAST:CHI2_PEA (P21226) Endochitinase A2 precursor (EC 3.2.1.14)//	BM381902	97.83	20.75	415.93	48.71	4.25	2.94	6.74	318.1	*
Zm.6446.1.A1_at	Zm#S11523884|PCO118291 mRNA sequence BLAST:Y1502_CLOPE (P58698) Hypothetical protein CPE1502//	AI691796	39.1	2.15	163.5	26.75	4.18	3.02	5.41	124.4	*
Zm.3455.3.A1_at	Zm#S11523275|Glutamine synthetase BLAST:GLNA1_MAIZE (P38559) Glutamine synthetase root isozyme 1 (EC 6.3.1.2) (Glutamate--ammonia ligase) (GS122)//	BQ619345	71.13	38.17	295.93	19.19	4.16	2.18	35.5	224.8	*
Zm.9942.1.A1_at	Zm#S27896811|Transcribed locus, weakly similar to XP_464970.1 unknown protein [Oryza sativa (japonica cultivar-group)] BLAST:PP1RA_PANTR (Q7YR38) Serine/threonine-protein phosphatase 1 regulatory subunit 10 (MHC class I region proline-rich protein CAT53)//	CK368883	85.67	2.33	355.23	67.7	4.15	2.84	5.47	269.57	*
Zm.409.1.S1_at	NOTHING | beta-fructosidase, putative / beta-//	U17695.1	75.63	12.85	311.73	17.78	4.12	3.16	5.78	236.1	*
Zm.3303.2.A1_at	Zm#S11418672|Lipoxygenase BLAST:LOX2_ORYSA (P29250) Lipoxygenase 2 (EC 1.13.11.12) (Lipoxygenase L-2)//	CO527646	282.43	11.23	1134.17	144.08	4.02	3.15	4.91	851.73	*
Zm.12293.1.S1_at	Zm#S22334386|PCO153521 mRNA sequence BLAST:BI1_ORYSA (Q9MBD8) Bax inhibitor 1 (BI-1) (OsBI-1)/called_in_both_way/	CN844282	186.87	12.95	739.1	16.46	3.96	3.53	4.49	552.23	*
Zm.17271.7.A1_x_at	gb:BI679460 /DB_XREF=gi:15632367 /DB_XREF=949002B07.y1 /TID=Zm.17271.7 /CNT=7 /FEA=EST /TIER=Stack /STK=6 /UG=Zm.17271 /UG_TITLE=PCO096351 mRNA sequence /REP_ORG=Z. mays	BI679460	1263.4	338.62	4974.6	310.46	3.94	2.69	7.09	3711.2	*
Zm.6450.1.S1_at	Zm#S27933752|CL11845_1 mRNA sequence BLAST:EXG_BLUGR (Q96V64) Glucan 1,3-beta-glucosidase precursor (EC 3.2.1.58) (Exo-1,3-beta-glucanase)//	CF245049	137.57	43.45	532.2	99.09	3.87	2.22	8.38	394.63	*
Zm.13728.2.S1_a_at	gb:AY106266.1 /DB_XREF=gi:21209344 /TID=Zm.13728.2 /CNT=9 /FEA=mRNA /TIER=ConsEnd /STK=0 /UG=Zm.13728 /UG_TITLE=Alpha-expansin 4 (expA4) mRNA, partial cds /DEF=Zea mays PCO074010 mRNA sequence. /REP_ORG=Z. mays	AY106266.1	55.7	4.46	214.13	52.74	3.84	2.26	5.57	158.43	*
Zm.17266.1.A1_at	NOTHING | DNAJ heat shock N-terminal domain-c//	CF245152	87.77	12.75	335.9	21.44	3.83	3	5.11	248.13	*
Zm.12387.1.S1_at	Zm#S11529068|Translation initiation factor 5A BLAST:IF5A_MAIZE (P80639) Eukaryotic translation initiation factor 5A (eIF-5A) (eIF-4D)//called_in_inparanoid	AW000286	789.63	107.71	2976.4	209.45	3.77	2.97	4.97	2186.77	*
Zm.1540.1.S1_a_at	gb:L23548.1 /DB_XREF=gi:388052 /TID=Zm.1540.1 /CNT=151 /FEA=FLmRNA /TIER=FL+Stack /STK=22 /UG=Zm.1540 /UG_TITLE=Maize Adh1-F mRNA for alcohol dehydrogenase /DEF=Zea mays alcohol dehydrogenase (Adh1-S) mRNA, complete cds. /FL=gb:L23548.1 /REP_ORG=Z. mays	L23548.1	145.13	9.49	543.07	129.48	3.74	2.25	5.32	397.93	*
Zm.17971.1.A1_at	Zm#S19020089|Transcribed locus BLAST://	CK827063	50.7	7.22	189.27	18.32	3.73	2.84	5.06	138.57	*
Zm.17219.2.S1_a_at	gb:AY106749.1 /DB_XREF=gi:21209827 /TID=Zm.17219.2 /CNT=1 /FEA=mRNA /TIER=ConsEnd /STK=0 /UG=Zm.17219 /UG_TITLE=PCO120693 mRNA sequence /DEF=Zea mays PCO120693 mRNA sequence. /REP_ORG=Z. mays	AY106749.1	48	2.81	178.53	26.64	3.72	2.77	4.74	130.53	*
Zm.3303.1.A1_x_at	gb:AF271894.1 /DB_XREF=gi:8515850 /GEN=LOX /TID=Zm.3303.1 /CNT=106 /FEA=FLmRNA /TIER=FL+Stack /STK=45 /UG=Zm.3303 /DEF=Zea mays lipoxygenase (LOX) mRNA, complete cds. /PROD=lipoxygenase /FL=gb:AF271894.1 /REP_ORG=Z. mays	AF271894.1	210.23	14.53	779.8	184.36	3.71	2.24	5.27	569.57	*
ZmAffx.950.1.A1_at	gb:AI833420 /DB_XREF=gi:5455730 /DB_XREF=605089B04.x1 /TID=ZmAffx.950.1 /CNT=1 /FEA=EST /TIER=ConsEnd /STK=0 /NOTE=sequence(s) not in UniGene /REP_ORG=Z. mays	AI833420	43.07	10.22	159.83	9.04	3.71	2.63	6.13	116.77	*
Zm.485.1.A1_at	NOTHING | non-symbiotic hemoglobin 1 (HB1) (G/called_in_both_way/called_in_inparanoid	AF236080.1	111.4	12.64	408.33	74.19	3.67	2.48	5.12	296.93	*
Zm.17740.2.A1_a_at	gb:BI430966 /DB_XREF=gi:15209082 /DB_XREF=949063E02.y1 /TID=Zm.17740.2 /CNT=3 /FEA=EST /TIER=ConsEnd /STK=0 /UG=Zm.17740 /UG_TITLE=Transcribed sequences /REP_ORG=Z. mays	BI430966	56.97	17.24	205.2	20.87	3.6	2.31	7.27	148.23	*
Zm.4164.3.A1_s_at	gb:CF636517 /DB_XREF=gi:37398409 /DB_XREF=zmrww00_0B10-009-f12.s1 /TID=Zm.4164.3 /CNT=51 /FEA=EST /TIER=Stack /STK=14 /UG=Zm.4164 /UG_TITLE=CL18052_1 mRNA sequence /REP_ORG=Z. mays	CF636517	235.97	23.19	831.37	185.24	3.52	2.18	5.05	595.4	*
Zm.12129.1.S1_at	Zm#S27909776|PCO091343 mRNA sequence BLAST:LYM2_ARATH (O23006) LysM domain GPI-anchored protein 2 precursor/called_in_both_way/	BM380039	208.1	15.6	726.7	34.13	3.49	3.03	4.06	518.6	*
Zm.16313.1.S1_a_at	gb:CF626466 /DB_XREF=gi:37379444 /DB_XREF=zmrws05_0B10-016-b04.s3 /TID=Zm.16313.1 /CNT=27 /FEA=EST /TIER=ConsEnd /STK=1 /UG=Zm.16313 /UG_TITLE=Transcribed sequence with weak similarity to protein ref:NP_181674.1 (A.thaliana) ERD15 protein (Arabidopsis thaliana) /REP_ORG=Z. mays	CF626466	468.97	31.49	1630.47	314.18	3.48	2.34	4.69	1161.5	*
Zm.3918.1.S1_at	Zm#S11395727|Transcribed locus, weakly similar to XP_470580.1 Putative membrane protein [Oryza sativa (japonica cultivar-group)] BLAST:ISAA_STAES (Q8CMZ9) Immunodominant staphylococcal antigen A precursor//	AW062130	62.4	14.45	210.97	22.11	3.38	2.32	5.59	148.57	*
Zm.2968.1.A1_at	NOTHING | //	AY106977.1	78.97	16.54	265.93	30.76	3.37	2.34	5.3	186.97	*
Zm.4416.1.S1_at	NOTHING | similar to phosphoinositide-specifi/called_in_both_way/called_in_inparanoid	AY536525.1	146.53	21.47	487.67	52.13	3.33	2.49	4.58	341.13	*
Zm.3904.1.S1_at	Zm#S25102235|PCO074636 mRNA sequence BLAST:LBD40_ARATH (Q9ZW96) LOB domain protein 40//	AY109271.1	53.27	6.26	176.77	35.62	3.32	2.14	4.75	123.5	*
Zm.3630.1.A1_at	Zm#S11333297|Transcribed locus, weakly similar to XP_550375.1 putative prolin rich protein [Oryza sativa (japonica cultivar-group)] BLAST:PRF1_LYCES (Q00451) 36.4 kDa proline-rich protein//	BM380179	303.07	101.07	1007.67	54.99	3.32	2.12	7.39	704.6	*
Zm.3994.1.S1_at	NOTHING | pyruvate decarboxylase, putative, s/called_in_both_way/called_in_inparanoid	AF370005.1	185.47	18.43	614.5	118.63	3.31	2.2	4.61	429.03	*
Zm.8200.1.S1_at	Zm#S23951873|Transcribed locus, strongly similar to NP_909832.1 putative leucine-rich repeat protein [Oryza sativa (japonica cultivar-group)] BLAST:BAK1_ARATH (Q94F62) BRASSINOSTEROID INSENSITIVE 1-associated receptor kinase 1 precursor (EC 2.7.11.1) (BRI//	BM379197	381.8	17.09	1230.9	80.19	3.22	2.82	3.66	849.1	*
Zm.5882.1.A1_at	Zm#S27929502|CL31450_1 mRNA sequence BLAST:NAC68_ORYSA (Q52QH4) NAC domain-containing protein 68 (ONAC068)/called_in_both_way/	AI637237	46.03	7.77	147.77	29.81	3.21	2.01	4.95	101.73	*
Zm.11852.2.A1_x_at	gb:BG266778 /DB_XREF=gi:12970028 /DB_XREF=1000101E01.x1 /TID=Zm.11852.2 /CNT=2 /FEA=EST /TIER=ConsEnd /STK=0 /UG=Zm.11852 /UG_TITLE=Transcribed sequences /REP_ORG=Z. mays	BG266778	53.4	5.38	170.07	7.77	3.18	2.68	3.87	116.67	*
Zm.14838.1.A1_at	NOTHING | ATPase 2, plasma membrane-type, put//	AJ539534.1	696.3	17.21	2208	51.57	3.17	3	3.35	1511.7	*
Zm.17243.1.S1_at	Zm#S11526450|PCO144723 mRNA sequence BLAST:CIPK1_ORYSA (Q6X4A2) CIPK-like protein 1 (EC 2.7.11.1) (OsCK1)//called_in_inparanoid	CK786707	56.23	3.22	178.3	15.41	3.17	2.66	3.74	122.07	*
Zm.2477.1.A1_at	Zm#S22335926|Clone EL01N0503E10.c mRNA sequence BLAST:CJ022_HUMAN (Q96SZ5) Protein C10orf22//called_in_inparanoid	BM347825	50.8	3.26	159.9	27.67	3.15	2.22	4.14	109.1	*
Zm.11691.1.A1_at	Zm#S26229269|Transcribed locus BLAST:CSKI1_RAT (Q8VHK2) Caskin-1 (CASK-interacting protein 1)//	BM379957	103.67	12.08	324.93	14.23	3.13	2.59	3.92	221.27	*
Zm.16510.1.A1_at	Zm#S26326099|Transcribed locus, moderately similar to NP_199774.1 AAP6 (AMINO ACID PERMEASE 6); amino acid permease [Arabidopsis thaliana] BLAST:AVT7_YEAST (P40501) Vacuolar amino acid transporter 7//	CK347176	54.47	11.26	168.57	6.75	3.09	2.29	4.71	114.1	*
ZmAffx.785.1.A1_at	gb:AI759084 /DB_XREF=gi:5152786 /DB_XREF=605084G11.x1 /TID=ZmAffx.785.1 /CNT=1 /FEA=EST /TIER=ConsEnd /STK=0 /NOTE=sequence(s) not in UniGene /REP_ORG=Z. mays	AI759084	67.97	3.85	205.63	32.52	3.03	2.21	3.89	137.67	*
Zm.2568.1.A1_a_at	gb:BM079095 /DB_XREF=gi:16926027 /DB_XREF=MEST89-C05.T3 /CLONE=MEST89-C05 /TID=Zm.2568.1 /CNT=22 /FEA=EST /TIER=ConsEnd /STK=1 /UG=Zm.2568 /UG_TITLE=Transcribed sequences /REP_ORG=Z. mays	BM079095	84.3	2.89	254.33	28.36	3.02	2.45	3.61	170.03	*
Zm.9751.1.A1_at	Zm#S32374190|Transcribed locus, moderately similar to XP_472223.1 OSJNBa0083D01.24 [Oryza sativa (japonica cultivar-group)] BLAST:RIN4_ARATH (Q8GYN5) RPM1-interacting protein 4//	BM378815	77.47	5.84	232.93	16.76	3.01	2.53	3.58	155.47	*
Zm.1419.1.S1_at	Zm#S11526540|PCO072275 mRNA sequence BLAST:7SB1_SOYBN (P13917) Basic 7S globulin precursor (Bg) (SBg7S) [Contains: Basic 7S globulin high-kDa subunit; Basic 7S globulin low-kDa subunit]/called_in_both_way/	CO527884	703.53	77.45	2088.53	311.16	2.97	2.14	3.99	1385	*
Zm.2298.2.A1_at	Zm#S11486730|Transcribed locus, strongly similar to XP_473942.1 OSJNBa0053K19.8 [Oryza sativa (japonica cultivar-group)] BLAST:GOX_SPIOL (P05414) Peroxisomal (S)-2-hydroxy-acid oxidase (EC 1.1.3.15) (Glycolate oxidase) (GOX) (Short chain alpha-hydroxy aci//	BQ619139	89.07	10.94	262.53	43.88	2.95	2.04	4.11	173.47	*
Zm.8113.1.S1_at	Zm#S11427799|Transcribed locus BLAST:CYTI_VIGUN (Q06445) Cysteine proteinase inhibitor (Cystatin)//	BM072984	87.43	5.45	257.57	19.01	2.95	2.51	3.45	170.13	*
Zm.8617.1.A1_at	Zm#S27402417|Transcribed locus, weakly similar to NP_194710.1 ATMKK2 (MAP KINASE KINASE 2); MAP kinase kinase/ kinase [Arabidopsis thaliana] BLAST:MP2K2_XENLA (Q07192) Dual specificity mitogen-activated protein kinase kinase 2 (EC 2.7.12.2) (MAP kinase ki//	BM074921	78.73	2.46	231.8	13.11	2.94	2.64	3.27	153.07	*
Zm.800.1.S1_at	NOTHING | phosphoenolpyruvate carboxylase, pu| Q9SAZ6| Phosphoenolpyruvate carboxylase (EC 4.1.1.31) [Ppc1C] [Zea mays(Maize)]//	BG319937	282.63	20.95	827.17	65.96	2.93	2.44	3.5	544.53	*
Zm.20.1.S1_at	NOTHING | calcium-dependent protein kinase, p//	D84408.1	134.67	3.46	393.63	31.47	2.92	2.52	3.33	258.97	*
Zm.1579.1.S1_at	Zm#S11524707|PCO071987 mRNA sequence BLAST:ALKK_PSEOL (Q00594) Medium-chain-fatty-acid--CoA ligase (EC 6.2.1.-) (Medium-chain acyl-CoA synthetase)/called_in_both_way/called_in_inparanoid	AY107917.1	62.47	1.17	175.67	21.8	2.81	2.23	3.4	113.2	*
Zm.6977.1.S1_at	NOTHING | ' sucrose synthase, putative / sucros/called_in_both_way/called_in_inparanoid	X02400.1	401.53	35.48	1101.47	150.59	2.74	2.06	3.55	699.93	*
Zm.7791.1.A1_at	Zm#S11528077|PCO073390 mRNA sequence BLAST:RL9_ORYSA (P49210) 60S ribosomal protein L9//	BM382756	70.1	9.28	192.4	22.64	2.74	2.05	3.71	122.3	*
Zm.813.1.S1_at	NOTHING | glutathione S-transferase zeta 1 (G//	AF244683.1	101.23	4.54	275.6	17.82	2.72	2.38	3.09	174.37	*
Zm.18016.1.S1_at	Zm#S11527203|In2-1 protein BLAST:PHF1_ARATH (Q8GYE0) Sec12-like protein 1 (Protein PHOSPHATE TRANSPORTER TRAFFIC FACILITATOR 1) (PHF-1)/called_in_both_way/called_in_inparanoid	CF047687	81.7	5.31	222.5	20.02	2.72	2.25	3.26	140.8	*
Zm.3285.1.A1_at	Zm#S26238975|PCO155774 mRNA sequence BLAST:PHF1_MOUSE (Q9Z1B8) PHD finger protein 1 (PHF1 protein) (T-complex testis-expressed 3) (Polycomblike 1) (mPCl1)//	AY106489.1	581.97	37.13	1576.6	100.13	2.71	2.33	3.14	994.63	*
Zm.17762.1.S1_at	Zm#S25117360|Transcribed locus, moderately similar to NP_908456.1 unnamed protein product [Oryza sativa (japonica cultivar-group)] BLAST:LTI6B_ORYSA (Q6AT93) Hydrophobic protein LTI6B (Low temperature-induced protein 6B)//called_in_inparanoid	CK369807	124.2	2.95	337.03	50.22	2.71	2.04	3.39	212.83	*
Zm.9494.1.A1_a_at	gb:CF628595 /DB_XREF=gi:37383209 /DB_XREF=zmrws48_0A10-007-f06.s3 /TID=Zm.9494.1 /CNT=4 /FEA=EST /TIER=ConsEnd /STK=1 /UG=Zm.9494 /UG_TITLE=Transcribed sequence with weak similarity to protein ref:NP_200309.1 (A.thaliana) putative protein (Arabidopsis thaliana) /REP_ORG=Z. mays	CF628595	69.77	2.8	185.17	6.98	2.65	2.42	2.91	115.4	*
Zm.39.1.S1_s_at	gb:D87042.1 /DB_XREF=gi:1504051 /TID=Zm.39.1 /CNT=8 /FEA=FLmRNA /TIER=FL /STK=1 /UG=Zm.39 /DEF=Zea mays mRNA for Calcium-dependent protein kinase, complete cds. /PROD=Calcium-dependent protein kinase /FL=gb:D87042.1 /REP_ORG=Z. mays	D87042.1	194.43	14.93	513.67	35.99	2.64	2.23	3.14	319.23	*
Zm.11852.1.A1_a_at	gb:CF013366 /DB_XREF=gi:32908553 /DB_XREF=QBK5b03.xg /CLONE=QBK5b03 /TID=Zm.11852.1 /CNT=13 /FEA=EST /TIER=ConsEnd /STK=0 /UG=Zm.11852 /UG_TITLE=Transcribed sequences /REP_ORG=Z. mays	CF013366	322.7	41.82	843.83	53.09	2.61	2.09	3.39	521.13	*
Zm.3066.1.A1_at	NOTHING | catalase 1, identical to catalase 1//	M33103.1	658.03	66.69	1695.53	110.9	2.58	2.13	3.17	1037.5	*
Zm.4033.1.A1_at	Zm#S11528026|PCO147721 mRNA sequence BLAST:ADH2_MAIZE (P04707) Alcohol dehydrogenase 2 (EC 1.1.1.1)/called_in_both_way/called_in_inparanoid	CF636055	310.77	16.65	793.57	98.67	2.55	2	3.14	482.8	*
Zm.16832.1.A1_at	Zm#S31647659|CL10929_-2 mRNA sequence BLAST:YDJH_ECOLI (P77493) Hypothetical sugar kinase ydjH//	CD968014	290.43	16.05	704.33	22.69	2.43	2.19	2.7	413.9	*
Zm.7372.1.A1_x_at	gb:BM379583 /DB_XREF=gi:18178373 /DB_XREF=MEST507-E07.univ /CLONE=MEST507-E07 /TID=Zm.7372.1 /CNT=10 /FEA=EST /TIER=Stack /STK=6 /UG=Zm.7372 /UG_TITLE=Transcribed sequence with moderate similarity to protein ref:NP_563622.1 (A.thaliana) expressed protein (Arabidopsis thaliana) /REP_ORG=Z. mays	BM379583	227.77	12.88	550.37	24.18	2.42	2.15	2.72	322.6	*
Zm.14159.1.A1_at	Zm#S27399434|PCO062765 mRNA sequence BLAST:CO6A1_CHICK (P20785) Collagen alpha-1(VI) chain precursor/called_in_both_way/	AY108992.1	449.5	23.15	1065.13	45.84	2.37	2.12	2.65	615.63	*
Zm.7889.1.A1_at	NOTHING | somatic embryogenesis receptor-like//	AW091189	76.47	3.75	177.23	6.79	2.32	2.09	2.57	100.77	*
Zm.12108.1.A1_at	Zm#S26666795|Transcribed locus, weakly similar to XP_506630.1 PREDICTED P0646B04.11 gene product [Oryza sativa (japonica cultivar-group)] BLAST:PCGF4_MOUSE (P25916) Polycomb group RING finger protein 4 (Polycomb complex protein BMI-1)//	BM379185	133.13	4.62	303.07	17.99	2.28	2.03	2.54	169.93	*
Zm.31.2.A1_a_at	gb:AY109335.1 /DB_XREF=gi:21212909 /TID=Zm.31.2 /CNT=1 /FEA=mRNA /TIER=ConsEnd /STK=0 /UG=Zm.31 /UG_TITLE=Maize 16-kDa zein-2 mRNA, complete cds /DEF=Zea mays CL3558_3 mRNA sequence. /REP_ORG=Z. mays	AY109335.1	327.23	14.79	140.77	5.48	-2.32	-2.11	-2.56	-186.47	*
Zm.16958.3.S1_a_at	gb:CO528527 /DB_XREF=gi:50333401 /DB_XREF=3530_1_189_1_A05.y_1 /TID=Zm.16958.3 /CNT=15 /FEA=EST /TIER=ConsEnd /STK=0 /UG=Zm.16958 /UG_TITLE=PCO154340 mRNA sequence /REP_ORG=Z. mays	CO528527	325.9	21.59	124.97	16.58	-2.61	-2.07	-3.4	-200.93	*
Zm.2549.1.A1_at	Zm#S11440237|Transcribed locus BLAST://	BM336803	176.3	24.12	56.77	9.97	-3.11	-2.17	-4.61	-119.53	*
Zm.5796.1.A1_at	Zm#S11527299|PCO106588 mRNA sequence BLAST:EFGC_SOYBN (P34811) Elongation factor G, chloroplast precursor (EF-G)//	BM332299	171.73	26.13	50.77	13.24	-3.38	-2.14	-6.16	-120.97	*
Zm.15307.1.A1_at	Zm#S11523194|CL217_2 mRNA sequence BLAST:IBBR_ORYSA (P07084) Bowman-Birk type bran trypsin inhibitor precursor (RBTI) (OSE727A)/called_in_both_way/called_in_inparanoid	CF014037	675.03	135.17	169.4	45.53	-3.98	-2.32	-7.59	-505.63	*
Zm.80.1.A1_at	NOTHING | beta-amylase (BMY1) / 1,4-alpha-D-g//called_in_inparanoid	CD972407	2154.93	128.45	530.97	72.24	-4.06	-3.23	-5.31	-1623.97	*
Zm.2031.4.A1_x_at	gb:BM341698 /DB_XREF=gi:18171858 /DB_XREF=MEST338-C11.T3 /CLONE=MEST338-C11 /TID=Zm.2031.4 /CNT=134 /FEA=EST /TIER=Stack /STK=6 /UG=Zm.2031 /UG_TITLE=PCO086923 mRNA sequence /REP_ORG=Z. mays	BM341698	1140.57	207.34	279	116.94	-4.09	-2.16	-13.42	-861.57	*
Zm.12171.1.A1_at	Zm#S11526303|PCO088178 mRNA sequence BLAST:KATL1_HUMAN (Q9BW62) Katanin p60 ATPase-containing subunit A-like 1 (EC 3.6.4.3) (Katanin p60 subunit A-like 1) (p60 katanin-like 1)/called_in_both_way/called_in_inparanoid	AY106321.1	155.9	26.94	37.73	10.12	-4.13	-2.52	-7.74	-118.17	*
ZmAffx.1194.1.S1_at	gb:BE025369 /DB_XREF=gi:8318624 /DB_XREF=945025G09.Y1 /TID=ZmAffx.1194.1 /CNT=1 /FEA=EST /TIER=ConsEnd /STK=0 /NOTE=sequence(s) not in UniGene /REP_ORG=Z. mays	BE025369	162.2	21.24	36.57	23.16	-4.44	-2.07	-100000000	-125.63	*
Zm.2031.4.A1_at	Zm#S11528960|PCO086923 mRNA sequence BLAST://	BM341698	1300.8	336.71	290.53	122.8	-4.48	-2.08	-15.25	-1010.27	*
Zm.8614.1.A1_at	NOTHING | //	BM341063	756.57	190.76	168.67	17.72	-4.49	-2.57	-6.67	-587.9	*
Zm.6763.3.A1_at	Zm#S11528894|Ribulose 1,5-bisphosphate carboxylase small subunit BLAST:RBS_MAIZE (P05348) Ribulose bisphosphate carboxylase small chain, chloroplast precursor (EC 4.1.1.39) (RuBisCO small subunit)/called_in_both_way/	AY105013.1	274.57	23.57	53.3	13.46	-5.15	-3.52	-8.93	-221.27	*
Zm.11680.1.A1_at	Zm#S11451510|Transcribed locus, weakly similar to NP_188532.2 protein binding / structural constituent of cell wall [Arabidopsis thaliana] BLAST://	BM379902	127.67	57.17	14.57	6.44	-8.76	-2.13	-35.07	-113.1	*
$	220 genes satisfied the comparison filtering criteria
	Probesets being induced by SG200Δpep1 compared to SG200 infected tissue
	Probesets being repressed by SG200Δpep1 compared to SG200 infected tissue
